1 **Estimating relative CWD susceptibility and disease progression in farmed whitetail deer with rare**  
2 **PRNP alleles**

3 **Haley, NJ<sup>1</sup>; Merrett, K<sup>1</sup>; Buros Stein, A<sup>2</sup>; Simpson, D<sup>3</sup>; Carlton, A<sup>3</sup>; Mitchell, G<sup>4</sup>; Staskevicius, A<sup>4</sup>;**  
4 **Nichols, T<sup>5</sup>; Lehmkuhl, AD<sup>6</sup>; Thomsen, BV<sup>6,7</sup>.**

5 **1. Department of Microbiology and Immunology, College of Graduate Studies, Midwestern**  
6 **University, Glendale, AZ**

7 **2. Office of Research and Sponsored Programs, Midwestern University, Glendale, AZ**

8 **3. Simpson Whitetails Genetic Testing, Belleville, MI**

9 **4. National and OIE Reference Laboratory for Scrapie and CWD, Canadian Food Inspection Agency,**  
10 **Ottawa Laboratory-Fallowfield, Ottawa, Ontario, Canada.**

11 **5. United States Department of Agriculture, APHIS, Veterinary Services, Cervid Health Program, Fort**  
12 **Collins, CO, USA.**

13 **6. United States Department of Agriculture, APHIS, Veterinary Services, National Veterinary Services**  
14 **Laboratories, Ames, IA, USA.**

15 **7. United States Department of Agriculture, APHIS, Veterinary Services, Center for Veterinary Biologics,**  
16 **Ames, IA, USA.**

17

18 **Abstract**

19 Chronic wasting disease is a prion disease affecting both free-ranging and farmed cervids in North  
20 America and Scandinavia. A range of cervid species have been found to be susceptible, each with  
21 variations in the gene for the normal prion protein, PRNP, reportedly influencing both disease  
22 susceptibility and progression in the respective hosts. Despite the finding of several different PRNP alleles  
23 in whitetail deer, the majority of past research has focused on two of the more common alleles identified  
24 – the 96G and 96S alleles. In the present study, we evaluate both infection status and disease stage in  
25 nearly 2100 farmed deer depopulated in the United States and Canada, including 714 CWD-positive deer  
26 and correlate our findings with PRNP genotype, including the more rare 95H, 116G, and 226K alleles. We

27 found significant differences in either likelihood of being found infected or disease stage (and in many  
28 cases both) at the time of depopulation in all genotypes present, relative to the most common 96GG  
29 genotype. Despite high prevalence in many of the herds examined, infection was not found in several of  
30 the reported genotypes. These findings suggest that additional research is necessary to more properly  
31 define the role that these genotypes may play in managing CWD in both farmed and free-ranging whitetail  
32 deer, with consideration for factors including relative fitness levels, incubation periods, and the kinetics  
33 of shedding in animals with these rare genotypes.

34

## 35 **Introduction**

36 Chronic wasting disease (CWD) is a progressive neurologic disease of cervids caused by a  
37 transmissible, misfolded protein – the prion protein. (54, 71) The disease is naturally occurring in whitetail  
38 deer (*Odocoileus virginianus*), mule deer (*Odocoileus hemionus*), Rocky Mountain elk and red deer (*Cervus*  
39 *elaphus* spp.), moose (*Alces alces*), and reindeer (*Rangifer tarandus*). (8) It has been reported in farmed  
40 and free-ranging cervids in 26 US states, 3 Canadian provinces, the Republic of Korea, Norway, Sweden,  
41 and Finland. (7, 8, 17, 52, 53, 64) Chronic wasting disease is highly transmissible through direct contact or  
42 environmental contamination, and has been detected at various levels in all tissues and bodily fluids of  
43 cervids examined to date. (1, 2, 18, 21, 24, 25, 38, 39, 41, 56)

44 The misfolded protein – commonly designated “PrP<sup>res</sup>” due to its resistance to harsh physical  
45 treatments, is derived from the cellular prion protein – “PrP<sup>C</sup>” – a normal protein encoded by the *PRNP*  
46 gene, which is present in a range of animals in the phylum Chordata. (12, 13, 55) Prion disease  
47 transmission and pathogenesis relies on the coerced conversion of normal PrP<sup>C</sup> by PrP<sup>res</sup> into the  
48 abnormally folded isoform, which collects in the form of amyloid in a variety of tissues, most notably the  
49 central nervous system, resulting in the eventual demise of the host. The tertiary structure of this  
50 misfolded protein, and its properly folded counterpart, is inherently dependent on its primary amino acid

51 sequence. (36, 43, 44, 49, 59, 61, 69, 72, 74) As such, the ability of the misfolded protein to coerce  
52 normally folded prion proteins into an abnormal, amyloid-forming structure is highly dependent on the  
53 primary amino acid sequence of both the infectious and host prion proteins. Significant variation between  
54 host and infectious prion proteins results in reduced host susceptibility, and in some cases complete  
55 resistance to disease – a phenomenon known as the “species barrier” when considering natural or  
56 experimental inter-species transmission of the infectious prion agent. (6, 34, 40, 57, 65)

57 Variations in prion disease susceptibility have been reported across most species naturally  
58 affected by these agents. Humans with variation in amino acids at either position 127 or 129 are resistant  
59 to various transmissible forms of Creutzfeldt-Jakob disease and Kuru. (4) Goats with amino acid variations  
60 present at positions 146, 211, and 222, as well as several other sites, show reduced susceptibility to either  
61 BSE or sheep scrapie. (14, 44, 68) Sheep with variations at position 136, 154, and 171, among others,  
62 present with a range of susceptibilities to classical scrapie – including, in the case of A<sub>136</sub>R<sub>154</sub>R<sub>171</sub>  
63 homozygous sheep, near-complete resistance to infection. (5, 26, 33) The latter finding has led to a  
64 multinational effort to breed sheep towards resistance to classical scrapie infection in areas where the  
65 disease is endemic, resulting in a significant decline and near-eradication of the disease in countries  
66 employing targeted breeding programs. (3, 45, 66)

67 Polymorphisms in the *PRNP* gene of whitetail deer, mule deer, elk, fallow deer and reindeer have  
68 all been found to influence susceptibility to CWD in wild, farmed, and experimental populations. (22, 27,  
69 42, 46, 47, 61) The low prevalence of CWD in these populations has often made it difficult to adequately  
70 understand the role these polymorphisms may play in the disease process. Additionally, many of these  
71 studies only incorporate a binary (positive or not detected) approach to disease diagnosis, and fail to  
72 include disease staging as a factor in susceptibility. (9, 27, 28, 31, 62) Lastly, and perhaps most importantly,  
73 most of these polymorphisms are quite rare, and animals homozygous for these alleles, or in rare  
74 heterozygous combinations, have neither been observed in CWD endemic populations nor tested for their

75 susceptibility following natural exposure. (61) Exceptions include the 225F polymorphism in mule deer  
76 and the 132L polymorphism in Rocky Mountain elk. In the case of 225FF homozygous mule deer, a small  
77 group of animals placed on a heavily contaminated pasture eventually developed progressive neurologic  
78 disease and neuropathology characteristic of CWD, although the 225F allele seems to be a significant  
79 barrier to infection in wild populations under more typical exposure conditions. (27, 73) Elk heterozygous  
80 or homozygous for the 132L polymorphism likewise show reduced susceptibility in both wild and captive  
81 populations, however 132LL homozygous elk have only rarely been found to be infected. (15, 46)

82         In the present study, we sought to better define the relative susceptibilities of whitetail deer  
83 heterozygous and homozygous for several different *PRNP* alleles, including 95H, 96G and 96S, 116G, and  
84 226K. Samples were analyzed from nearly 2100 farmed deer depopulated following exposure to CWD,  
85 including 714 deer infected with CWD, with postmortem prevalence ranging from 6-83% across 20  
86 separate herds in the United States and Canada. In addition to CWD status, we also examined the  
87 correlation of *PRNP* genotype with the stage of disease, ranging from one (detection in retropharyngeal  
88 lymph nodes, RLN, only) to five (detection in RLN in addition to significant immunostaining in the obex  
89 region of the brainstem). Finally, we surveyed 117 healthy whitetail deer herds in the United States and 7  
90 whitetail deer herds in Canada to assess the distribution of these five different alleles across North  
91 American farmed deer populations. We hypothesized that CWD status and disease stage would be most  
92 significant and severe in animals homozygous for the 96G allele, with other pairings less significantly and  
93 severely affected. We also hypothesized that allele frequencies would vary between the Canada and the  
94 United States, and within geographic regions of the United States. We found several combinations of  
95 alleles that were associated with significantly reduced CWD prevalence and/or disease severity, and that  
96 specific alleles may be more common in different regions of North America. These findings suggest that  
97 variations in susceptibility to CWD may play a role in managing the disease in this species, and those

98 variations may be more common in farmed deer in certain areas, warranting further exploration of *PRNP*  
99 markers in the natural whitetail deer host.

100

## 101 **Methods**

### 102 **Study Population**

103 Twenty whitetail deer herds depopulated in the United States (11 herds with 1185 adult animals)  
104 and Canada (9 herds with 906 adult animals) were included in the analysis. Each herd had initially reported  
105 one or more deer with a positive diagnosis of CWD, and was subsequently placed under quarantine. When  
106 the animals were later depopulated, a variety of samples were collected, including RLN and the obex  
107 region of the brainstem for conventional CWD testing, and either blood or ear punch for PCR amplification  
108 and sequencing of the *PRNP* gene. All herds were depopulated in roughly the past 5-10 years, though not  
109 all herds depopulated in those years had samples available, and in some cases samples were not available  
110 from all animals in their respective herds. Missing samples included animals too young to test, animals  
111 from which a sample was otherwise unavailable, and animals with poor quality DNA samples. Animal age  
112 was generally unknown, though only adult animals over 1 year of age were considered for the study. Of  
113 the 2091 animals evaluated, 714 were ultimately found to be CWD positive (34.1%). Further details on  
114 the herd sizes, their country of origin, gene frequencies, and CWD prevalence (based on results from cases  
115 with available DNA) can be found in **Table 1**.

116

### 117 **Unaffected Populations**

118 Samples from healthy animals in 117 herds in the United States (n=6030 animals) and 7 herds in  
119 Canada (n=1313 animals) were also evaluated for *PRNP* genotype frequencies. Herds in the United States  
120 were further subcategorized by region, and included 75 herds from the Midwest (n=3865 animals tested  
121 from Iowa, Indiana, Michigan, Minnesota, Missouri, North Dakota, Ohio and Wisconsin), 29 from the

122 Northeast (n=1651 from Pennsylvania), and 13 from the South (n=514 from Texas and Alabama).  
123 Although it was common for entire herds to be included in the analysis, it is important to note that herds  
124 submitting samples for testing were not likely to be random and the number of states, and herds included,  
125 in each region varied. A summary of allele frequencies in whitetail deer herds in the United States and  
126 Canada may be found in **Table 2**.

127

### 128 ***PRNP* analysis**

129 For CWD correlation, nucleic acids were extracted in most cases from whole blood samples  
130 preserved in EDTA, or in some cases ear punch biopsies, using a conventional DNA extraction kit.  
131 (ThermoFisher, USA) For healthy herd gene frequencies, DNA was most commonly extracted from hair  
132 samples provided by healthy herds across North America, though semen, antler core, ear notches and  
133 other biopsy samples were also included. An approximately 750bp *PRNP* gene sequence was amplified by  
134 conventional PCR and sequenced as previously described. (20, 47) PCR sequences were aligned and  
135 evaluated using Geneious software version 10.2 ([www.Geneious.com](http://www.Geneious.com)). Specific single nucleotide  
136 polymorphisms at position 95 (glutamine [Q] or histidine [H]), 96 (glycine [G] or serine [S]), 116 (alanine  
137 [A] or glycine), and 226 (glutamine or lysine [K]) were identified and recorded.

138

### 139 **Immunohistochemistry of retropharyngeal lymph node and brainstem**

140 Retropharyngeal lymph node and brainstem tissues were examined microscopically for  
141 PrP<sup>CWD</sup> immunostaining as previously described. (20, 67) Briefly, tissue was preserved in 10% neutral  
142 buffered formalin and subsequently embedded in paraffin blocks. Tissue sections 5 µm thick were  
143 mounted on glass slides and deparaffinized before treatment with 95% formic acid. Immunohistochemical  
144 staining for PrP<sup>CWD</sup> was performed with the primary antibody anti-prion 99 (Ventana Medical Systems,  
145 Tucson, AZ) and then counterstained with hematoxylin. The obex sections were scored from 0 to 4 on the

146 basis of the following criteria: grade 0, no IHC staining observed within the obex; grade 1, IHC staining  
147 only within the dorsal motor nucleus of the vagus (DMNV); grade 2, IHC staining within the DMNV and  
148 area postrema with or without focal staining in the nucleus of the solitary tract (NST) and adjacent white  
149 matter; grade 3, IHC staining in the DMNV and NST with light to moderate staining extending into other  
150 nuclei and white matter; grade 4, heavy IHC staining of the DMNV, multiple other nuclei, and white matter  
151 throughout the obex. Results were tabulated according to RLN and obex immunostaining, with individuals  
152 exhibiting immunostaining in the RLN alone scored as a “1,” while those with additional immunostaining  
153 in the obex scored as 2-5 depending on obex staining intensity. As with previous studies, all deer that had  
154 obex staining always concurrently had staining in the RLN, a finding characteristic of CWD in whitetail  
155 deer.

156

### 157 **Statistical analyses**

158 Statistical analysis was done using R version 3.5.1 with the *brms* (10) and *nlme* (50) packages. A  
159 linear mixed model, with herd included as a random effect, was used to calculate coefficients for disease  
160 stages relative to the 96GG genotype with associated 95% confidence intervals. A Bayesian mixed effects  
161 logistic regression model with herd again included as a random effect was used to determine odds ratios  
162 of infection in various genotypes relative to the 96GG genotype. A weakly informative prior for genotypes  
163 was defined as the Cauchy distribution with location and scale parameters of 0 and 2.5, respectively. The  
164 Markov-chain Monte-Carlo (MCMC) sampling was used with 500000 iterations, following an initial burn-  
165 in period of 5000 iterations. The scale reduction factor was calculated to assess convergence and  
166 adequate mixing of the chains. The posterior medians and 95% credible intervals were used for inference.

167 In order to predict outcomes for genotypes that were not observed, an additive mixed effects  
168 model, both linear and logistic, were built using data from measured allele pairs to estimate the  
169 contribution of each single allele. The prediction interval for the log odds estimate was calculated using

170 the *merTools* package (32) and is done by drawing a sampling distribution for the random and fixed effects  
171 and then estimating the fitted value across that distribution. The calculated interval includes all variation  
172 in the model except for variation in the covariance parameters.

173 A chi-squared test was used to compare *PRNP* frequencies between Canada and the United States,  
174 as well as between different regions of the United States.

175

## 176 **Results**

### 177 **Correlation of *PRNP* genotype with CWD infection status**

178 Positive and negative CWD infection status were correlated to *PRNP* genotypes using the 96GG  
179 genotype as a reference point to assess odds ratios of infection. A significant reduction in odds ratio of  
180 infection was seen with all genotypes examined, except for the 96G/226K genotype. While there was a  
181 trend towards reduced odds ratios in this genotype, the findings were not statistically significant. Among  
182 animals heterozygous for the 96G allele, odds ratios were lowest in animals carrying the 95H allele (0.257,  
183 95% CI: 0.08-0.80), though the results were not significantly different than those found in animals with  
184 the 96GS genotype (0.319, 95% CI: 0.23-0.43). Among alleles for which sufficient data was available for  
185 modeling, animals homozygous for the 116G allele had the lowest odds ratio of being found infected ( $3 \times$   
186  $10^{-6}$ ), though confidence intervals ranged widely. Results are summarized in Table 3 and Figure 1.  
187 Modeling odds ratios of infection in non-96G homozygous genotypes continued to exhibit wide-ranging  
188 confidence intervals, though suggested that 95HH homozygous genotypes in particular may have the  
189 lowest odds ratios for being found CWD positive.

190

### 191 **Correlation of *PRNP* genotype with CWD infection stage**

192 Disease stages were correlated to rare *PRNP* genotypes, again using the 96GG genotype as a  
193 reference point to evaluate differences in disease severity. In all genotypes examined, a significant



194 reduction in disease staging was observed compared to the 96GG reference genotype. As noted with odds  
195 ratios above, the most significant reduction in disease staging was observed in animals with the 95H/96G  
196 genotype (-1.205, 95% CI: -1.66 to -0.75), though again this finding was not significantly different than  
197 what was observed for 96GS heterozygous animals (-0.839, 95% CI: -0.96 to -0.72). Among animals with  
198 sufficient data available for modeling, disease staging was lowest in animals with the 96SS genotype,  
199 though it should be noted that low or absent numbers of rarer genotypes made their analysis challenging.  
200 Results again are summarized in **Table 3** and **Figure 1**, with models addressing disease progression in other  
201 homozygous genotypes again presented in **Figure 2**.

202

### 203 **Frequency of *PRNP* alleles in healthy farmed whitetail deer herds**

204 Significant differences were observed in the frequency of various alleles in Canadian and US  
205 herds – particularly with regard to the exclusive presence of the 116G allele in Canadian herds and the  
206 226K allele in US herds. The 96G allele was found to be at a significantly higher frequency in US herds,  
207 while the 96S allele was found to be at significantly higher frequencies in Canadian herds. Within the  
208 United States, significant differences in *PRNP* frequencies were also observed between different regions  
209 of the country, regions that are admittedly arbitrary with samples available only from some states within  
210 those regions. Most notably, the 95H allele was significantly more common in herds in the Northeast  
211 compared to both Midwestern and Southern herds, while the 96S allele was found at a higher frequency  
212 in Southern states compared to herds in the Midwest and Northeast. No differences in allele frequencies  
213 were observed between herds in the Canadian provinces of Alberta and Saskatchewan.

214 Because the samples from healthy deer herds in both the United States and Canada are presumed  
215 to have been submitted non-randomly – e.g. those herds financially capable of testing, and those having  
216 a particular interest in *PRNP* genotyping, it is important to note that these findings should be interpreted  
217 with caution.

218

## 219 **Discussion**

220           A significant amount of research over the past two decades has been conducted on *PRNP* gene  
221 frequencies in both wild and farmed whitetail deer populations affected by CWD, which cumulatively has  
222 led to the understanding that animals with different *PRNP* alleles are differentially susceptible to CWD  
223 infection. (17, 28, 31, 61, 67) Recent research has pointed to slower disease progression in animals with  
224 several of the more common genotypes, notably those carrying the 96S allele, in addition to their reduced  
225 susceptibility. (20, 67) Each of these previous studies, however, have suffered from limitations which may  
226 hinder broader interpretation, including low disease prevalence and/or negligible or absent populations  
227 of animals representing rarer genotypes. (9, 28, 29, 31) The present study represents one of the largest  
228 in-depth evaluations of the relationship between *PRNP* genotype and both CWD status and disease stage  
229 in whitetail deer, and the relatively high disease prevalence in many of these populations provided us with  
230 important insight into susceptibility and disease progression in some of the more rare genotypes.

231           Previous studies have typically focused on two of the most common alleles – commonly referred  
232 to as the 96G and 96S alleles, and the corresponding 96GG, 96GS, and 96SS genotypes. Occasionally these  
233 studies make use of genotyping strategies that might ignore the contribution of other, rarer alleles. (60,  
234 67) In the present study, as in past studies, the 96G and 96S alleles made up a substantial percentage of  
235 total alleles in a population, making statistical comparisons easier even with small population sizes. (20,  
236 61) We found that, in line with previous studies, animals with the 96GS and 96SS genotypes were at a  
237 significantly reduced risk of being found CWD positive at the time of depopulation, and were generally in  
238 a significantly earlier stage of disease when infected compared to animals with the 96GG genotype.

239           We extended our analyses to rarer alleles, including the 95H, 116G, and 226K alleles, which to  
240 date have only garnered passing interest in susceptibility studies. (28-30, 47) We report that the animals  
241 evaluated in this study with the 95H/96G and 96G/116G genotypes not only appear to face significantly

242 lower risk of being found CWD positive, they, like their 96GS and 96SS counterparts, were also found to  
243 be in significantly earlier stages of disease at the time of depopulation. While there was a trend towards  
244 reduced susceptibility in animals with the 96G/226K genotype, their differences compared to animals with  
245 the 96GG genotype were not statistically significant. The 96G/226K genotype was, however, found to  
246 correlate with significantly lower disease scores than 96GG homozygous animals in the study. Models  
247 extending available data to 95HH, 116GG, and 226KK homozygous genotypes suggest the potential for an  
248 even further reduction in both susceptibility and disease progression.

249 To a limited extent, both the 95H and 116G alleles have been evaluated in prior studies for CWD  
250 susceptibility in either free-ranging or farmed whitetail deer herds. A study of a wild deer population in  
251 Illinois found that animals with the 95H allele faced a risk of being found CWD-positive 1/5<sup>th</sup> that of the  
252 herd at large, similar to data reported in the present study (OR=0.257, **Table 3**). (31) A limited bioassay  
253 study including two animals with the 95H allele found that CWD incubation periods were nearly double  
254 that of their 96GG and 96GS counterparts. (29) Subsequent examinations of animals in that report  
255 suggested differences in CWD prion protease sensitivity which might affect diagnostic test results – an  
256 important factor to consider when evaluating the results from the present study. (48) An evaluation of a  
257 farmed herd in Nebraska, meanwhile, found that whitetail deer with the 116G allele were roughly half as  
258 likely to be found CWD positive compared to the herd at large, again very similar to the results reported  
259 here (OR=0.440, **Table 3**). (47) Little information is available regarding the 226K allele in the natural host;  
260 however, *in vitro* misfolding studies have shown that, like several other rare cervid *PRNP* alleles,  
261 recombinant 226K prion protein is significantly limited in its ability to misfold in the presence of CWD  
262 prions. (19) Additional work is needed to more adequately define relative infection odds ratio and disease  
263 staging in not only the 96G/226K genotype, but other rare alleles as well – especially in animals  
264 homozygous for 95H, 116G, or 226K alleles.

265           While our findings, and those of past research efforts, suggest that deer with specific alleles face  
266 a significantly lower risk of being found CWD positive at depopulation – as well as a significant  
267 deceleration in disease progression when infected – it seems likely that deer carrying these alleles are not  
268 completely resistant to the disease. It is therefore uncertain what role, if any, *PRNP* genetics may play in  
269 the management of CWD in both farmed and free-ranging deer. From a diagnostic perspective, animals  
270 with more susceptible alleles exhibit a more rapid progression of the disease, and are thus more readily  
271 identified on antemortem testing. This particular factor may prove helpful in more quickly identifying  
272 infected herds and placing them under quarantine. (20, 67) The increased diagnostic sensitivity offered  
273 by animals with susceptible genotypes, however, should be carefully weighed against the drawbacks of  
274 raising highly susceptible animals, especially in areas where CWD is highly endemic.

275           Apart from the diagnostic challenges noted above, additional factors that should be considered  
276 include the role that less susceptible alleles may have on general animal health, any delays in disease  
277 progression, and the resultant kinetics of prion shedding in infected animals carrying them. At present,  
278 there is almost no objective information available on the fitness of various *PRNP* genotypes in cervids (73),  
279 and while there are several limited reports of CWD prion shedding in more common whitetail deer  
280 genotypes (11, 23, 51), the biological relevance of prions likely shed in biological fluids has proven more  
281 difficult to assess. (16, 38, 39) The lifespan of the host is also relevant when considering incubation periods  
282 of the disease – particularly in farmed deer, where age may be useful as a selective management factor,  
283 similar to strategies used to address concerns for zoonotic transmission of BSE from cattle. (63) Lastly, it  
284 is critical to understand the mutable nature of the CWD prion agent itself in the face of shifting host  
285 genetic background, and whether any novel strains that may arise have any notable differences in disease  
286 manifestation and zoonotic potential. (35, 37, 58, 70)

287           In free-ranging herds, it is even less clear if there is a role for human intervention, and more  
288 importantly whether CWD may be actively shaping *PRNP* allele frequencies in wild populations. (61) At

289 least one study has found that the less susceptible 96S allele may provide a significant fitness advantage  
290 in a CWD endemic area, making it especially valuable to reevaluate the current frequencies of *PRNP* alleles  
291 in areas hard hit by the CWD epidemic. (60) As with farmed deer, understanding the relationship between  
292 *PRNP* genotype, fitness, prion shedding, and incubation periods would prove useful to those seeking to  
293 manage the disease in wild herds as allele frequencies shift over time. Our surveillance efforts in farmed  
294 populations shows that rare alleles are fairly well distributed across North America, with potential regional  
295 variation in frequencies, and similar efforts in wild cervids in both North America and Scandinavia may  
296 prove both useful and informative.

297 In summary, we provide further evidence that specific and often rare *PRNP* alleles of whitetail  
298 deer appear to correlate strongly to both CWD susceptibility and progression. Though rare, these alleles  
299 may be found in farmed deer herds across the United States and Canada, with potential, as yet  
300 unexplained, regional variations observed. Ongoing studies in farmed deer should provide some insight  
301 into both the relative fitness of animals carrying these alleles and their utility in managing CWD in endemic  
302 areas. The role these genotypes may have in managing the disease in free-ranging whitetail deer should  
303 likewise continue to be explored, within the context of those considerations noted above.

304

### 305 **Acknowledgements**

306 This study was funded in large part by the North American Deer Farmers Association and  
307 Whitetails of Wisconsin. The authors would like to thank all of the deer farmers who were involved in the  
308 depopulation events, which formed the basis for the present study. We are also thankful for the support  
309 personnel working with the United States Department of Agriculture, the National Veterinary Services  
310 Laboratory, and the Canadian Food Inspection Agency who helped facilitate post-mortem sample  
311 collection and processing for this study.

312 **Figure Legends**

313 **Figure 1. Summary of log odds ratios of whitetail deer with 96G heterozygous and 96SS homozygous genotypes being found CWD positive,**  
 314 **and the stage of disease recorded among those infected relative to the 96GG genotype.** The most common genotypes found in the study are

315 presented, showing that all heterozygous 96G crosses exhibit some level of slowed disease progression and/or reduced susceptibility.

316

317 **Figure 2. Estimates of log odds ratios and disease staging for the 96S, 116G, 226K, and 95H alleles in the homozygous state.** Using data from

318 measured allele pairs, an additive mixed effects model was developed to predict outcomes in genotypes with insufficient data. Predicted

319 estimates for disease susceptibility and progression are show for both heterozygous 96G genotypes and homozygous pairings.

320

321 **Tables**

| Herd ID      | Location             | Number present | Number available for testing | Allele Frequency % |             |             |          |            | CWD Prevalence % |
|--------------|----------------------|----------------|------------------------------|--------------------|-------------|-------------|----------|------------|------------------|
|              |                      |                |                              | 95H                | 96G         | 96S         | 116G     | 226K       |                  |
| A            | United States        | 81             | 80                           | 0                  | 73.1        | 22.5        | 0        | 4.4        | 12.5             |
| B            | United States        | 99             | 96                           | 0.5                | 60.4        | 35.4        | 0        | 3.6        | 9.4              |
| C            | United States        | 47             | 47                           | 0                  | 67.0        | 33.0        | 0        | 0          | 12.8             |
| D            | United States        | 140            | 140                          | 2.9                | 71.4        | 24.6        | 0        | 1.1        | 5.7              |
| E            | United States        | 129            | 128                          | 5.1                | 72.3        | 19.5        | 0        | 3.1        | 19.5             |
| F            | United States        | 99             | 99                           | 0                  | 80.3        | 18.7        | 0        | 1.0        | 9.1              |
| G            | United States        | 85             | 79                           | 0                  | 94.9        | 5.1         | 0        | 0          | 26.6             |
| H            | United States        | 116            | 116                          | 0                  | 59.9        | 38.4        | 0        | 1.7        | 22.4             |
| I            | United States        | 18             | 14                           | 3.6                | 71.4        | 21.4        | 0        | 3.6        | 35.7             |
| J            | United States        | 356            | 356                          | 1.1                | 61.7        | 36.8        | 0        | 4.2        | 79.8             |
| K            | United States        | 36             | 30                           | 1.7                | 80.0        | 16.7        | 0        | 1.7        | 20.0             |
| <b>Total</b> | <b>United States</b> | <b>1206</b>    | <b>1185</b>                  | <b>1.4</b>         | <b>69.0</b> | <b>28.1</b> | <b>0</b> | <b>1.5</b> | <b>34.5</b>      |

|              |               |             |            |             |             |             |             |          |             |
|--------------|---------------|-------------|------------|-------------|-------------|-------------|-------------|----------|-------------|
| L            | Canada        | 72          | 43         | 0           | 77.9        | 10.5        | 11.6        | 0        | 30.2        |
| M            | Canada        | 29          | 29         | 0           | 65.5        | 34.5        | 0           | 0        | 82.8        |
| N            | Canada        | 56          | 55         | 0           | 68.2        | 23.6        | 8.2         | 0        | 23.6        |
| O            | Canada        | 179         | 133        | 0           | 73.7        | 21.1        | 5.3         | 0        | 8.3         |
| P            | Canada        | 325         | 241        | 0.2         | 68.9        | 22.2        | 8.7         | 0        | 58.1        |
| Q            | Canada        | 23          | 12         | 0           | 70.8        | 20.8        | 8.3         | 0        | 41.7        |
| R            | Canada        | 70          | 47         | 0           | 51.1        | 47.9        | 1.1         | 0        | 63.9        |
| S            | Canada        | 66          | 35         | 1.4         | 62.9        | 21.4        | 14.3        | 0        | 11.4        |
| T            | Canada        | 414         | 311        | 0           | 71.4        | 2.4         | 26.2        | 0        | 20.9        |
| <b>Total</b> | <b>Canada</b> | <b>1264</b> | <b>908</b> | <b>0.11</b> | <b>69.6</b> | <b>16.5</b> | <b>13.8</b> | <b>0</b> | <b>33.8</b> |

322  
323 **Table 1: Summary of herds in the United States and Canada providing samples for the present study.** Eleven herds in the United States,  
324 comprised of 1185 samples from individual deer, and nine herds from Canada, comprised of 906 samples from individual deer, were included in  
325 the analysis. Allele frequencies and prevalence data from each herd and country, based on animals for which both genetic data and CWD status  
326 are available, are shown.

327

| Location                   | Number of Herds | Number of Animals | Allele Frequency % |             |             |            |            |
|----------------------------|-----------------|-------------------|--------------------|-------------|-------------|------------|------------|
|                            |                 |                   | 95H                | 96G         | 96S         | 116G       | 226K       |
| <b>United States</b>       |                 |                   |                    |             |             |            |            |
| Midwest                    | 75              | 3865              | 1.5                | 72.6        | 22.1        | 0          | 3.6        |
| Northeast                  | 29              | 1651              | 3.1                | 71.5        | 21.1        | 0          | 4.1        |
| South                      | 13              | 514               | 0                  | 58.1        | 39.2        | 0          | 2.7        |
| <b>United States Total</b> | <b>117</b>      | <b>6030</b>       | <b>1.8</b>         | <b>71.0</b> | <b>23.3</b> | <b>0</b>   | <b>3.7</b> |
| <b>Canada</b>              |                 |                   |                    |             |             |            |            |
| Alberta                    | 4               | 629               | 0.56               | 67.1        | 29.8        | 2.5        | 0          |
| Saskatchewan               | 2               | 684               | 2.2                | 62.9        | 31.4        | 3.3        | 0          |
| <b>Canada Total</b>        | <b>6</b>        | <b>1313</b>       | <b>1.4</b>         | <b>65.0</b> | <b>30.7</b> | <b>2.9</b> | <b>0</b>   |

328

329 **Table 2: Summary of genotype frequencies in healthy North American whitetail deer herds.** Data from whole herds opting to perform PRNP  
 330 genotyping were included in the analysis, which found significant differences in distribution between Canada and the United States, as well as  
 331 between specific regions of the United States.  
 332

| Genotype | Bayes Logistic OR | Logistic 95% CI | Linear Coefficient | Linear 95% CI  |
|----------|-------------------|-----------------|--------------------|----------------|
| 96GS     | 0.319             | (0.23, 0.43)    | -0.839             | (-0.96, -0.72) |
| 96SS     | 0.069             | (0.04, 0.12)    | -1.502             | (-1.72, -1.29) |
| 95H/96G  | 0.257             | (0.08, 0.80)    | -1.205             | (-1.66, -0.75) |
| 96G/116G | 0.440             | (0.28, 0.68)    | -0.463             | (-0.67, -0.26) |
| 96G/226K | 0.551             | (0.18, 1.39)    | -0.828             | (-1.28, -0.38) |
| 96S/116G | 0.090             | (0.02, 0.36)    | -1.130             | (-1.63, -0.63) |
| 116GG    | 0.000003          | (0.00, 0.30)    | -0.853             | (-1.39, -0.32) |
| 96S/226K | 0.00005           | (0.00, 0.68)    | -1.137             | (-1.96, -0.31) |
| 95H/96S  | 0.018             | (0.00, 2.56)    | -0.744             | (-1.92, 0.43)  |

333  
 334 **Table 3. Relative CWD susceptibility and disease staging in whitetail deer with rare alleles, in reference to the 96GG genotype.** Odds ratio of  
 335 identifying infection in rare alleles was determined using Bayesian mixed effects logistic regression, while relative disease stages were calculated  
 336 using linear coefficient modeling. Significantly lower odds of being found infected, relative to the 96GG genotype, were observed in all rare  
 337 genotypes except for the 96G/226K genotype, where findings were suggestive of lower odds ratios, though statistically inconclusive. Negative  
 338 values for disease staging indicate a trend towards earlier stages of disease, and a significantly lower disease stage was found in all rare genotypes  
 339 evaluated relative to animals with the 96GG genotype.



- 340 1. **Angers, R. C., S. R. Browning, T. S. Seward, C. J. Sigurdson, M. W. Miller, E. A. Hoover, and G. C.**  
341 **Telling.** 2006. Prions in skeletal muscles of deer with chronic wasting disease. *Science (New York,*  
342 *N.Y.* **311**:1117.
- 343 2. **Angers, R. C., T. S. Seward, D. Napier, M. Green, E. Hoover, T. Spraker, K. O'Rourke, A.**  
344 **Balachandran, and G. C. Telling.** 2009. Chronic wasting disease prions in elk antler velvet.  
345 *Emerging infectious diseases* **15**:696-703.
- 346 3. **Arnold, M., and A. Ortiz-Pelaez.** 2014. The evolution of the prevalence of classical scrapie in sheep  
347 in Great Britain using surveillance data between 2005 and 2012. *Prev Vet Med* **117**:242-250.
- 348 4. **Asante, E. A., M. Smidak, A. Grimshaw, R. Houghton, A. Tomlinson, A. Jeelani, T. Jakubcova, S.**  
349 **Hamdan, A. Richard-Londt, J. M. Linehan, S. Brandner, M. Alpers, J. Whitfield, S. Mead, J. D.**  
350 **Wadsworth, and J. Collinge.** 2015. A naturally occurring variant of the human prion protein  
351 completely prevents prion disease. *Nature* **522**:478-481.
- 352 5. **Baylis, M., and W. Goldmann.** 2004. The genetics of scrapie in sheep and goats. *Curr Mol Med*  
353 **4**:385-396.
- 354 6. **Belay, E. D., R. A. Maddox, E. S. Williams, M. W. Miller, P. Gambetti, and L. B. Schonberger.**  
355 2004. Chronic wasting disease and potential transmission to humans. *Emerging infectious*  
356 *diseases* **10**:977-984.
- 357 7. **Benestad, S. L., G. Mitchell, M. Simmons, B. Ytrehus, and T. Vikoren.** 2016. First case of chronic  
358 wasting disease in Europe in a Norwegian free-ranging reindeer. *Veterinary research* **47**:88.
- 359 8. **Benestad, S. L., and G. C. Telling.** 2018. Chronic wasting disease: an evolving prion disease of  
360 cervids. *Handbook of clinical neurology* **153**:135-151.
- 361 9. **Brandt, A. L., M. L. Green, Y. Ishida, A. L. Roca, J. Novakofski, and N. E. Mateus-Pinilla.** 2018.  
362 Influence of the geographic distribution of prion protein gene sequence variation on patterns of  
363 chronic wasting disease spread in white-tailed deer (*Odocoileus virginianus*). *Prion* **12**:204-215.
- 364 10. **Burkner, P.** 2018. Advanced Bayesian Multilevel Modeling with the R Package brms. *The R Journal*  
365 **10**:395-411.
- 366 11. **Davenport, K. A., B. A. Mosher, B. M. Brost, D. M. Henderson, N. D. Denkers, A. V. Nalls, E.**  
367 **McNulty, C. K. Mathiason, and E. A. Hoover.** 2018. Assessment of Chronic Wasting Disease Prion  
368 Shedding in Deer Saliva with Occupancy Modeling. *Journal of clinical microbiology* **56**.
- 369 12. **DeArmond, S. J.** 2004. Discovering the mechanisms of neurodegeneration in prion diseases.  
370 *Neurochemical research* **29**:1979-1998.
- 371 13. **Dormont, D.** 2002. Prion diseases: pathogenesis and public health concerns. *FEBS letters* **529**:17-  
372 21.
- 373 14. **Fast, C., W. Goldmann, P. Berthon, K. Tauscher, O. Androletti, I. Lantier, C. Rossignol, A.**  
374 **Bossers, J. G. Jacobs, N. Hunter, M. H. Groschup, F. Lantier, and J. P. M. Langeveld.** 2017.  
375 Protecting effect of PrP codons M142 and K222 in goats orally challenged with bovine spongiform  
376 encephalopathy prions. *Veterinary research* **48**:52.
- 377 15. **Haley, N., D. Henderson, R. Donner, S. Wyckoff, K. Merrett, J. Tennant, E. Hoover, D. Love, E.**  
378 **Kline, A. Lehmkuhl, and B. Thomsen.** Under Review. Management of Chronic Wasting Disease in  
379 Ranged Elk: Conclusions from a Longitudinal Three-Year Study.
- 380 16. **Haley, N., C. Mathiason, M. D. Zabel, G. C. Telling, and E. Hoover.** 2009. Detection of sub-clinical  
381 CWD infection in conventional test-negative deer long after oral exposure to urine and feces from  
382 CWD+ deer. *PLoS ONE* **4**:e7990.
- 383 17. **Haley, N. J., and E. A. Hoover.** 2015. Chronic Wasting Disease of Cervids: Current Knowledge and  
384 Future Perspectives. *Annu Rev Anim Biosci*.
- 385 18. **Haley, N. J., C. K. Mathiason, S. Carver, M. Zabel, G. C. Telling, and E. A. Hoover.** 2011. Detection  
386 of chronic wasting disease prions in salivary, urinary, and intestinal tissues of deer: potential  
387 mechanisms of prion shedding and transmission. *Journal of virology* **85**:6309-6318.

- 388 19. **Haley, N. J., R. Rielinger, K. A. Davenport, K. O'Rourke, G. Mitchell, and J. A. Richt.** 2017.  
389 Estimating chronic wasting disease susceptibility in cervids using real-time quaking-induced  
390 conversion. *The Journal of general virology* **98**:2882-2892.
- 391 20. **Haley, N. J., C. Siepkner, W. D. Walter, B. V. Thomsen, J. J. Greenlee, A. D. Lehmkuhl, and J. A.**  
392 **Richt.** 2016. Antemortem Detection of Chronic Wasting Disease Prions in Nasal Brush Collections  
393 and Rectal Biopsy Specimens from White-Tailed Deer by Real-Time Quaking-Induced Conversion.  
394 *Journal of clinical microbiology* **54**:1108-1116.
- 395 21. **Haley, N. J., A. Van de Motter, S. Carver, D. Henderson, K. Davenport, D. M. Seelig, C. Mathiason,**  
396 **and E. Hoover.** 2013. Prion-seeding activity in cerebrospinal fluid of deer with chronic wasting  
397 disease. *PLoS ONE* **8**:e81488.
- 398 22. **Hamir, A. N., J. J. Greenlee, E. M. Nicholson, R. A. Kunkle, J. A. Richt, J. M. Miller, and M. Hall.**  
399 2011. Experimental transmission of chronic wasting disease (CWD) from elk and white-tailed deer  
400 to fallow deer by intracerebral route: final report. *Can J Vet Res* **75**:152-156.
- 401 23. **Henderson, D. M., N. D. Denkers, C. E. Hoover, N. Garbino, C. K. Mathiason, and E. A. Hoover.**  
402 2015. Longitudinal Detection of Prion Shedding in Saliva and Urine by Chronic Wasting Disease-  
403 Infected Deer by Real-Time Quaking-Induced Conversion. *Journal of virology* **89**:9338-9347.
- 404 24. **Henderson, D. M., M. Manca, N. J. Haley, N. D. Denkers, A. V. Nalls, C. K. Mathiason, B. Caughey,**  
405 **and E. A. Hoover.** 2013. Rapid Antemortem Detection of CWD Prions in Deer Saliva. *PLoS ONE*  
406 **8**:e74377.
- 407 25. **Henderson, D. M., J. M. Tennant, N. J. Haley, N. D. Denkers, C. K. Mathiason, and E. A. Hoover.**  
408 2017. Detection of chronic wasting disease prion seeding activity in deer and elk feces by real-  
409 time quaking-induced conversion. *The Journal of general virology* **98**:1953-1962.
- 410 26. **Jeffrey, M., S. Martin, F. Chianini, S. Eaton, M. P. Dagleish, and L. Gonzalez.** 2014. Incidence of  
411 infection in Prnp ARR/ARR sheep following experimental inoculation with or natural exposure to  
412 classical scrapie. *PLoS ONE* **9**:e91026.
- 413 27. **Jewell, J. E., M. M. Conner, L. L. Wolfe, M. W. Miller, and E. S. Williams.** 2005. Low frequency of  
414 PrP genotype 225SF among free-ranging mule deer (*Odocoileus hemionus*) with chronic wasting  
415 disease. *The Journal of general virology* **86**:2127-2134.
- 416 28. **Johnson, C., J. Johnson, J. P. Vanderloo, D. Keane, J. M. Aiken, and D. McKenzie.** 2006. Prion  
417 protein polymorphisms in white-tailed deer influence susceptibility to chronic wasting disease.  
418 *The Journal of general virology* **87**:2109-2114.
- 419 29. **Johnson, C. J., A. Herbst, C. Duque-Velasquez, J. P. Vanderloo, P. Bochsler, R. Chappell, and D.**  
420 **McKenzie.** 2011. Prion protein polymorphisms affect chronic wasting disease progression. *PLoS*  
421 *ONE* **6**:e17450.
- 422 30. **Keane, D. P., D. J. Barr, P. N. Bochsler, S. M. Hall, T. Gidlewski, K. I. O'Rourke, T. R. Spraker, and**  
423 **M. D. Samuel.** 2008. Chronic wasting disease in a Wisconsin white-tailed deer farm. *J Vet Diagn*  
424 *Invest* **20**:698-703.
- 425 31. **Kelly, A. C., N. E. Mateus-Pinilla, J. Diffendorfer, E. Jewell, M. O. Ruiz, J. Killefer, P. Shelton, T.**  
426 **Beissel, and J. Novakofski.** 2008. Prion sequence polymorphisms and chronic wasting disease  
427 resistance in Illinois white-tailed deer (*Odocoileus virginianus*). *Prion* **2**:28-36.
- 428 32. **Knowles, J. E., and C. Frederick.** merTools: Tools for Analyzing Mixed Effect Regression Models. R  
429 Package version 0.5.0.
- 430 33. **Lacroux, C., H. Cassard, H. Simmons, J. Yves Douet, F. Corbiere, S. Lugan, P. Costes, N. Aron, A.**  
431 **Huor, C. Tillier, F. Schelcher, and O. Andreoletti.** 2017. Classical scrapie transmission in ARR/ARR  
432 genotype sheep. *The Journal of general virology* **98**:2200-2204.
- 433 34. **Laurent, M.** 1998. Bistability and the species barrier in prion diseases: stepping across the  
434 threshold or not. *Biophysical chemistry* **72**:211-222.

- 435 35. **Li, J., S. Browning, S. P. Mahal, A. M. Oelschlegel, and C. Weissmann.** 2010. Darwinian evolution  
436 of prions in cell culture. *Science (New York, N.Y)* **327**:869-872.
- 437 36. **Lloyd, S. E., S. Mead, and J. Collinge.** 2013. Genetics of prion diseases. *Current opinion in genetics*  
438 *& development* **23**:345-351.
- 439 37. **Mahal, S. P., S. Browning, J. Li, I. Suponitsky-Kroyter, and C. Weissmann.** 2010. Transfer of a  
440 prion strain to different hosts leads to emergence of strain variants. *Proceedings of the National*  
441 *Academy of Sciences of the United States of America* **107**:22653-22658.
- 442 38. **Mathiason, C. K., S. A. Hays, J. Powers, J. Hayes-Klug, J. Langenberg, S. J. Dahmes, D. A. Osborn,**  
443 **K. V. Miller, R. J. Warren, G. L. Mason, and E. A. Hoover.** 2009. Infectious Prions in Pre-Clinical  
444 Deer and Transmission of Chronic Wasting Disease Solely by Environmental Exposure. *PLoS ONE*  
445 **4**:e5916.
- 446 39. **Mathiason, C. K., J. G. Powers, S. J. Dahmes, D. A. Osborn, K. V. Miller, R. J. Warren, G. L. Mason,**  
447 **S. A. Hays, J. Hayes-Klug, D. M. Seelig, M. A. Wild, L. L. Wolfe, T. R. Spraker, M. W. Miller, C. J.**  
448 **Sigurdson, G. C. Telling, and E. A. Hoover.** 2006. Infectious prions in the saliva and blood of deer  
449 with chronic wasting disease. *Science (New York, N.Y)* **314**:133-136.
- 450 40. **Mawhinney, S., W. J. Pape, J. E. Forster, C. A. Anderson, P. Bosque, and M. W. Miller.** 2006.  
451 Human prion disease and relative risk associated with chronic wasting disease. *Emerging*  
452 *infectious diseases* **12**:1527-1535.
- 453 41. **Miller, M. W., and M. A. Wild.** 2004. Epidemiology of chronic wasting disease in captive white-  
454 tailed and mule deer. *Journal of wildlife diseases* **40**:320-327.
- 455 42. **Mitchell, G. B., C. J. Sigurdson, K. I. O'Rourke, J. Algire, N. P. Harrington, I. Walther, T. R. Spraker,**  
456 **and A. Balachandran.** 2012. Experimental oral transmission of chronic wasting disease to reindeer  
457 (*Rangifer tarandus tarandus*). *PLoS ONE* **7**:e39055.
- 458 43. **Murdoch, B. M., and G. K. Murdoch.** 2015. Genetics of Prion Disease in Cattle. *Bioinformatics and*  
459 *biology insights* **9**:1-10.
- 460 44. **Niedermeyer, S., M. Eiden, P. Toumazos, P. Papasavva-Stylianou, I. Ioannou, T. Sklaviadis, C.**  
461 **Panagiotidis, J. Langeveld, A. Bossers, T. Kuczius, M. Kaatz, M. H. Groschup, and C. Fast.** 2016.  
462 Genetic, histochemical and biochemical studies on goat TSE cases from Cyprus. *Veterinary*  
463 *research* **47**:99.
- 464 45. **Nodelijk, G., H. J. van Roermund, L. J. van Keulen, B. Engel, P. Vellema, and T. J. Hagenaars.**  
465 2011. Breeding with resistant rams leads to rapid control of classical scrapie in affected sheep  
466 flocks. *Veterinary research* **42**:5.
- 467 46. **O'Rourke, K. I., T. E. Besser, M. W. Miller, T. F. Cline, T. R. Spraker, A. L. Jenny, M. A. Wild, G. L.**  
468 **Zebarth, and E. S. Williams.** 1999. PrP genotypes of captive and free-ranging Rocky Mountain elk  
469 (*Cervus elaphus nelsoni*) with chronic wasting disease. *The Journal of general virology* **80 ( Pt**  
470 **10)**:2765-2769.
- 471 47. **O'Rourke, K. I., T. R. Spraker, L. K. Hamburg, T. E. Besser, K. A. Brayton, and D. P. Knowles.** 2004.  
472 Polymorphisms in the prion precursor functional gene but not the pseudogene are associated  
473 with susceptibility to chronic wasting disease in white-tailed deer. *The Journal of general virology*  
474 **85**:1339-1346.
- 475 48. **Otero, A., C. Duque Velasquez, C. Johnson, A. Herbst, R. Bolea, J. J. Badiola, J. Aiken, and D.**  
476 **McKenzie.** 2019. Prion protein polymorphisms associated with reduced CWD susceptibility limit  
477 peripheral PrP(CWD) deposition in orally infected white-tailed deer. *BMC veterinary research*  
478 **15**:50.
- 479 49. **Pastore, A., and A. Zagari.** 2007. A structural overview of the vertebrate prion proteins. *Prion*  
480 **1**:185-197.
- 481 50. **Pinheiro, J., D. Bates, S. DebRoy, D. Sarkar, and R. C. Team.** 2019. nlme: Linear and Nonlinear  
482 Mixed Effects Models. R Package version 3.1-139.

- 483 51. **Plummer, I. H., S. D. Wright, C. J. Johnson, J. A. Pedersen, and M. D. Samuel.** 2017. Temporal  
484 patterns of chronic wasting disease prion excretion in three cervid species. *The Journal of general*  
485 *virology* **98**:1932-1942.
- 486 52. **ProMED-Mail.** 2019. CHRONIC WASTING DISEASE - SWEDEN: (NORRBOTTEN) MOOSE, FIRST CASE.  
487 53. **ProMED-Mail** 2018, posting date. CHRONIC WASTING DISEASE, CERVID - FINLAND: FIRST CASE,  
488 MOOSE. [Online.]
- 489 54. **Prusiner, S. B.** 1982. Novel proteinaceous infectious particles cause scrapie. *Science (New York,*  
490 *N.Y.* **216**:136-144.
- 491 55. **Prusiner, S. B.** 1998. Prions. *Proceedings of the National Academy of Sciences of the United States*  
492 *of America* **95**:13363-13383.
- 493 56. **Race, B., K. Meade-White, R. Race, and B. Chesebro.** 2009. Prion infectivity in fat of deer with  
494 chronic wasting disease. *Journal of virology* **83**:9608-9610.
- 495 57. **Raymond, G. J., A. Bossers, L. D. Raymond, K. I. O'Rourke, L. E. McHolland, P. K. Bryant, 3rd, M.**  
496 **W. Miller, E. S. Williams, M. Smits, and B. Caughey.** 2000. Evidence of a molecular barrier limiting  
497 susceptibility of humans, cattle and sheep to chronic wasting disease. *EMBO J* **19**:4425-4430.
- 498 58. **Raymond, G. J., L. D. Raymond, K. D. Meade-White, A. G. Hughson, C. Favara, D. Gardner, E. S.**  
499 **Williams, M. W. Miller, R. E. Race, and B. Caughey.** 2007. Transmission and adaptation of chronic  
500 wasting disease to hamsters and transgenic mice: evidence for strains. *Journal of virology*  
501 **81**:4305-4314.
- 502 59. **Richt, J. A., and S. M. Hall.** 2008. BSE case associated with prion protein gene mutation. *PLoS*  
503 *Pathog* **4**:e1000156.
- 504 60. **Robinson, S. J., M. D. Samuel, C. J. Johnson, M. Adams, and D. I. McKenzie.** 2012. Emerging prion  
505 disease drives host selection in a wildlife population. *Ecol Appl* **22**:1050-1059.
- 506 61. **Robinson, S. J., M. D. Samuel, K. I. O'Rourke, and C. J. Johnson.** 2012. The role of genetics in  
507 chronic wasting disease of North American cervids. *Prion* **6**:153-162.
- 508 62. **Samuel, M. D., and D. J. Storm.** 2016. Chronic wasting disease in white-tailed deer: infection,  
509 mortality, and implications for heterogeneous transmission. *Ecology* **97**:3195-3205.
- 510 63. **Smith, P. G., and R. Bradley.** 2003. Bovine spongiform encephalopathy (BSE) and its epidemiology.  
511 *British medical bulletin* **66**:185-198.
- 512 64. **Sohn, H. J., J. H. Kim, K. S. Choi, J. J. Nah, Y. S. Joo, Y. H. Jean, S. W. Ahn, O. K. Kim, D. Y. Kim,**  
513 **and A. Balachandran.** 2002. A case of chronic wasting disease in an elk imported to Korea from  
514 Canada. *The Journal of veterinary medical science / the Japanese Society of Veterinary Science*  
515 **64**:855-858.
- 516 65. **Surewicz, W. K., E. M. Jones, and A. C. Apetri.** 2006. The emerging principles of mammalian prion  
517 propagation and transmissibility barriers: Insight from studies in vitro. *Accounts of chemical*  
518 *research* **39**:654-662.
- 519 66. **Sutton, D.** 2015. Presented at the One Hundred and Nineteenth Annual Meeting of the United  
520 States Animal Health Association, Providence, RI.
- 521 67. **Thomsen, B. V., D. A. Schneider, K. I. O'Rourke, T. Gidlewski, J. McLane, R. W. Allen, A. A.**  
522 **Mclsaac, G. B. Mitchell, D. P. Keane, T. R. Spraker, and A. Balachandran.** 2012. Diagnostic  
523 accuracy of rectal mucosa biopsy testing for chronic wasting disease within white-tailed deer  
524 (*Odocoileus virginianus*) herds in North America: effects of age, sex, polymorphism at PRNP codon  
525 96, and disease progression. *J Vet Diagn Invest* **24**:878-887.
- 526 68. **Vouraki, S., A. I. Gelasakis, P. Alexandri, E. Boukouvala, L. V. Ekateriniadou, G. Banos, and G.**  
527 **Arsenos.** 2018. Genetic profile of scrapie codons 146, 211 and 222 in the PRNP gene locus in three  
528 breeds of dairy goats. *PLoS ONE* **13**:e0198819.
- 529 69. **Watts, J. C., and D. Westaway.** 2007. The prion protein family: diversity, rivalry, and dysfunction.  
530 *Biochim Biophys Acta* **1772**:654-672.

- 531 70. **Weissmann, C., J. Li, S. P. Mahal, and S. Browning.** 2011. Prions on the move. *EMBO reports*  
532 **12:1109-1117.**
- 533 71. **Williams, E. S., and S. Young.** 1980. Chronic wasting disease of captive mule deer: a spongiform  
534 encephalopathy. *Journal of wildlife diseases* **16:89-98.**
- 535 72. **Windl, O., M. Dempster, J. P. Estibeiro, R. Lathe, R. de Silva, T. Esmonde, R. Will, A. Springbett,**  
536 **T. A. Campbell, K. C. Sidle, M. S. Palmer, and J. Collinge.** 1996. Genetic basis of Creutzfeldt-Jakob  
537 disease in the United Kingdom: a systematic analysis of predisposing mutations and allelic  
538 variation in the PRNP gene. *Hum Genet* **98:259-264.**
- 539 73. **Wolfe, L. L., K. A. Fox, and M. W. Miller.** 2014. "Atypical" chronic wasting disease in PRNP  
540 genotype 225FF mule deer. *Journal of wildlife diseases* **50:660-665.**
- 541 74. **Wopfner, F., G. Weidenhofer, R. Schneider, A. von Brunn, S. Gilch, T. F. Schwarz, T. Werner, and**  
542 **H. M. Schatzl.** 1999. Analysis of 27 mammalian and 9 avian PrPs reveals high conservation of  
543 flexible regions of the prion protein. *J Mol Biol* **289:1163-1178.**
- 544
- 545

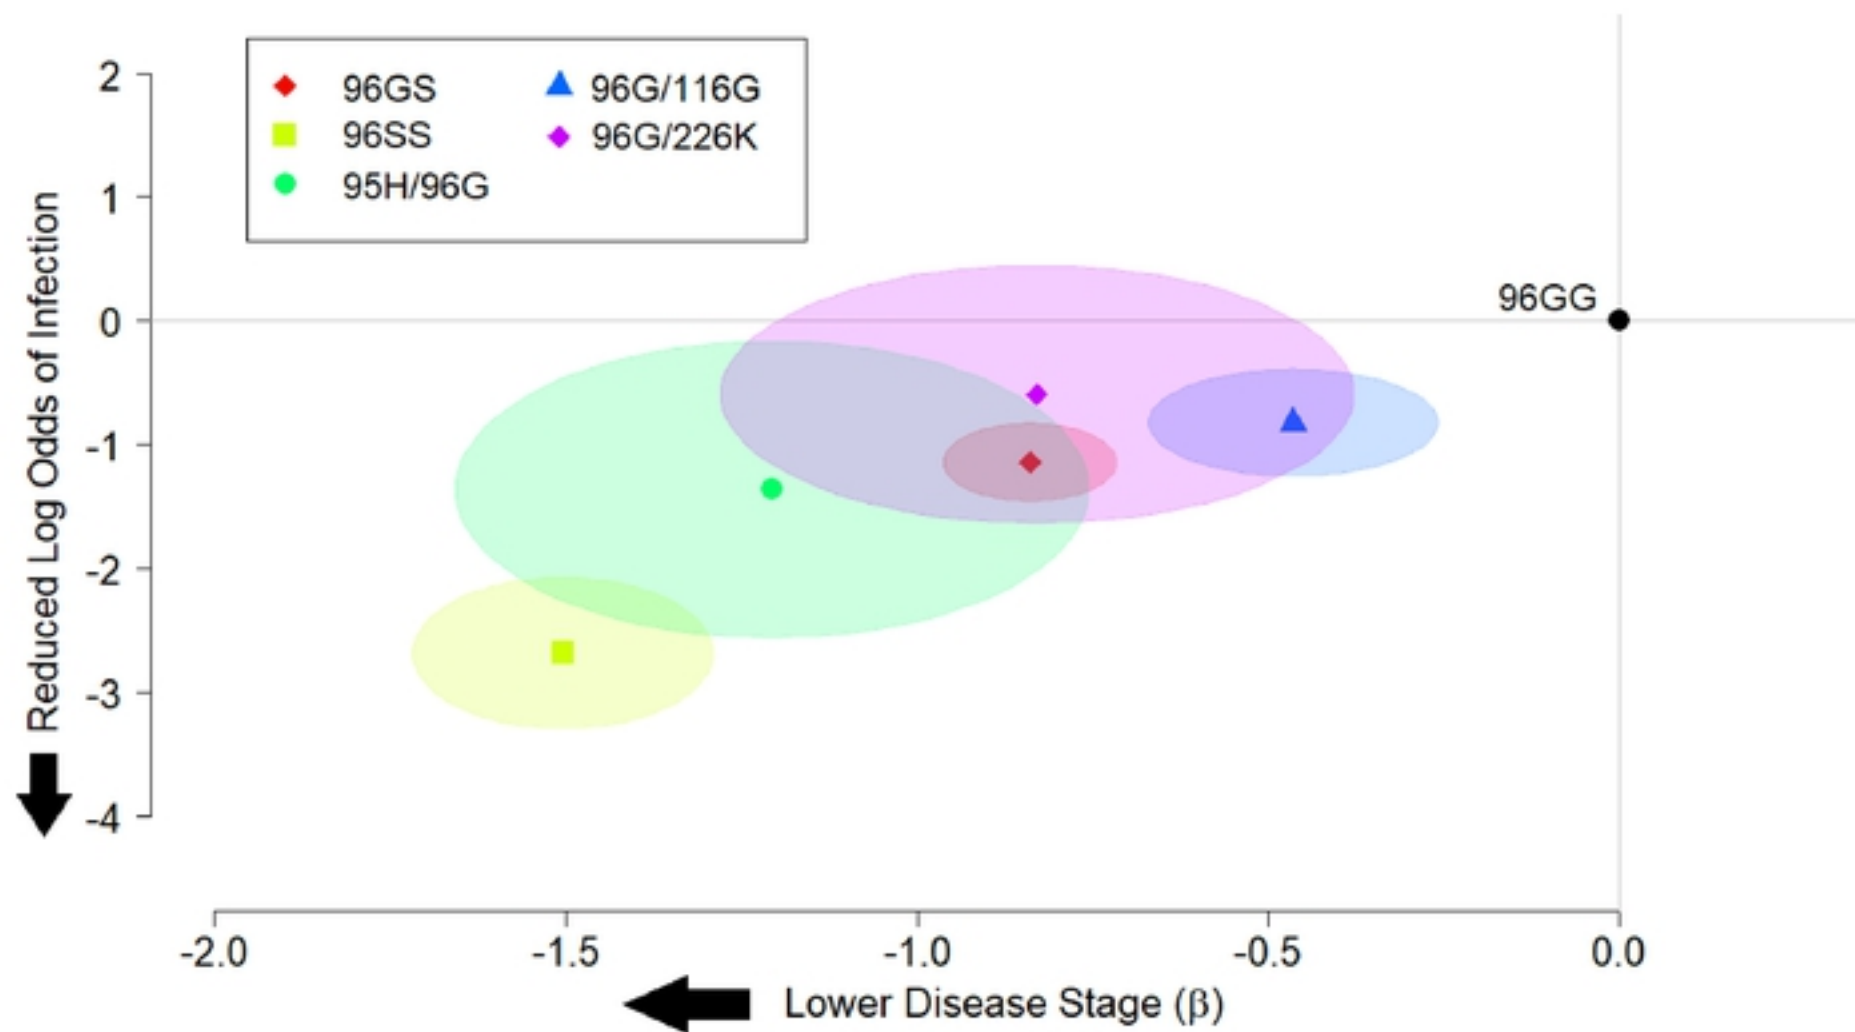

**Figure 1. Summary of log odds ratios of whitetail deer with 96G heterozygous and 96SS homozygous genotypes being found CWD positive, and the stage of disease recorded among those infected relative to the 96GG genotype. The most common genotypes found in the study are presented, showing that all heterozygous 96G crosses exhibit some level of slowed disease progression and/or reduced susceptibility.**

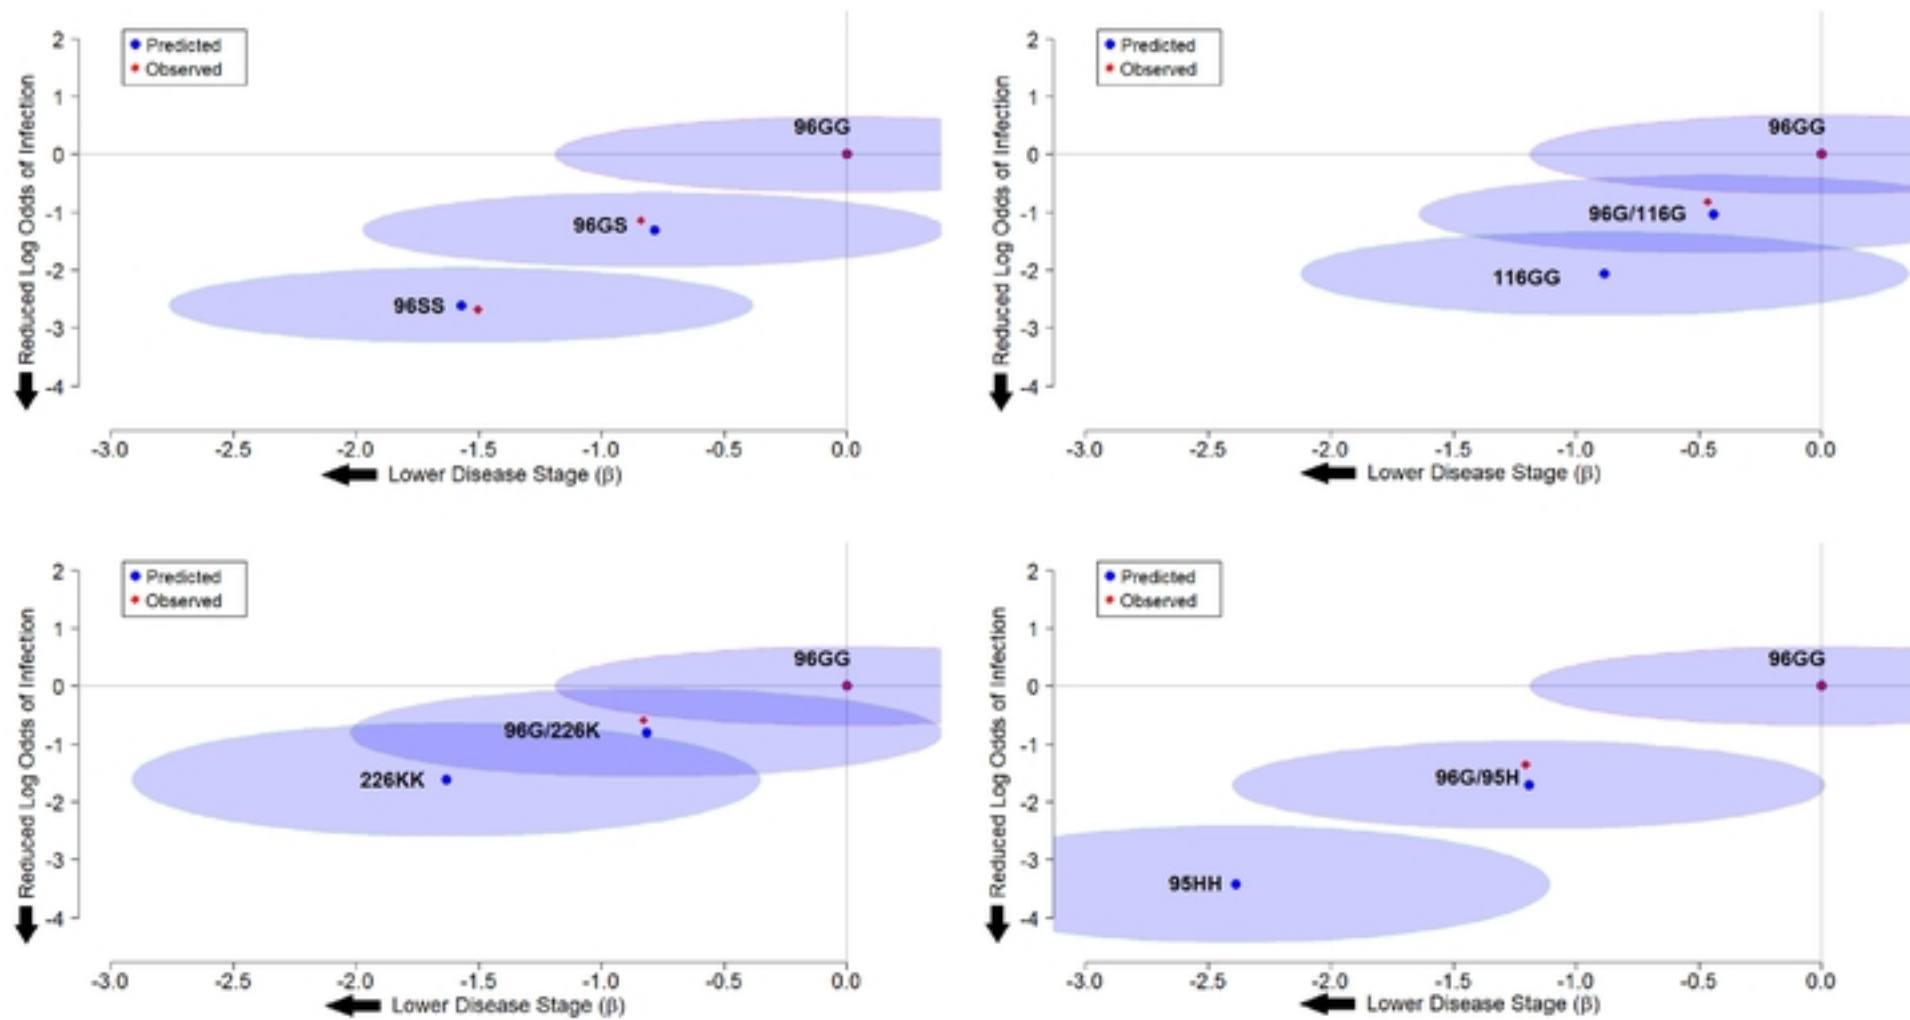

**Figure 2. Estimates of log odds ratios and disease staging for the 96S, 116G, 226K, and 95H alleles in the homozygous state.** Using data from measured allele pairs, an additive mixed effects model was developed to predict outcomes in genotypes with insufficient data. Predicted estimates for disease susceptibility and progression are shown for both heterozygous 96G genotypes and homozygous pairings.
